# Supplementary material for: Post-Transcriptional Regulation of PARP7 Protein Stability Is Controlled by Androgen Signaling
Source: PubMed Central journal article supplement (PMC7916378; doi:10.3390/cells10020363), 2021-02-09
Supplement: cells-10-00363-s001.pdf [file cells-10-00363-s001.pdf]

## Supplementary Materials

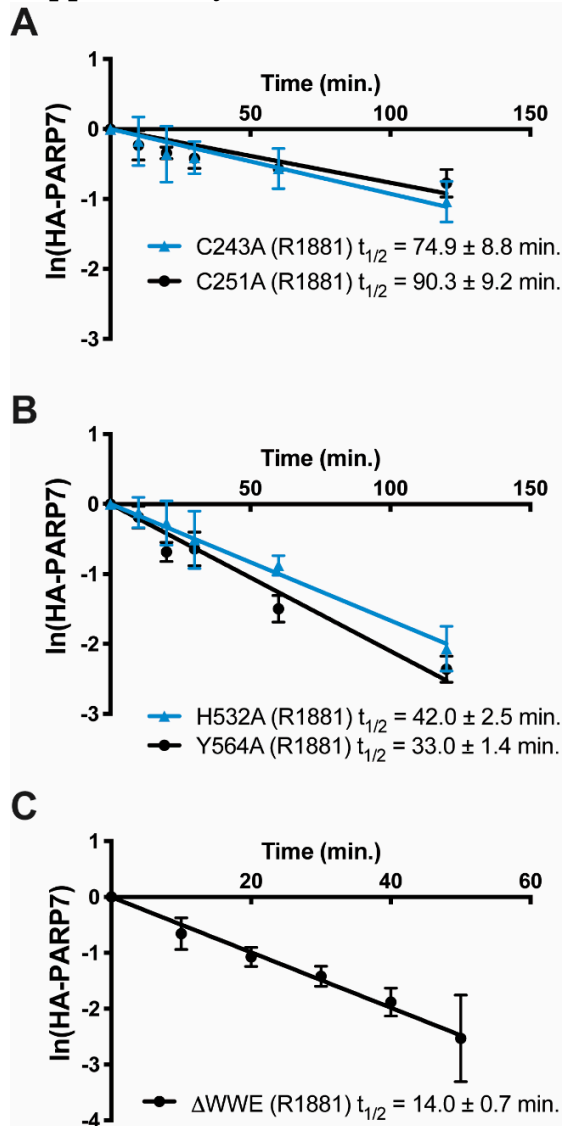

**Supplementary Figure S1.** Analysis of protein half-lives for PARP7 mutants in the presence of androgen. (A) PARP7 zinc finger mutants (C243A or C251A), (B) catalytic mutants (H532A or Y564A), or (C) WWE deletion mutant ( $\Delta$ WWE) was induced in PC3-Flag-AR cells by doxycycline treatment (2  $\mu$ g/mL, 24 h). Following doxycycline treatment, cells were treated with androgen (2 nM R1881, 6 h). Cycloheximide (CHX) time course experiments were conducted and analyzed as described in Fig 2A. Plots show mean  $\pm$  SD (n = 3) and protein half-lives.

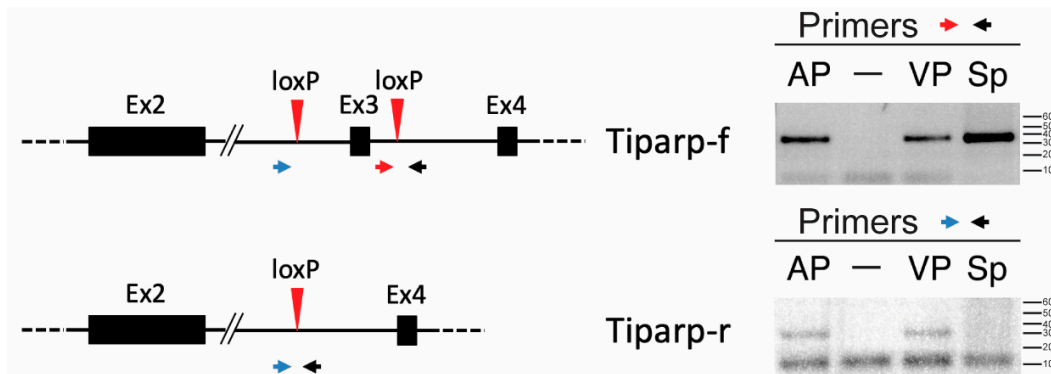

**Supplementary Figure S2.** Targeted disruption of the *Tiparp* gene in mouse prostate using Cre recombinase. Schematic of the conditional *Tiparp* allele before (upper) and after (lower) recombination. LoxP sites (red triangles) flank exon 3, which is removed by Cre-mediated excision. Positions of PCR primers used to detect the loxP (-f) allele and the recombined (-r) allele are shown (red, blue and black arrows). The red+black primer pair detects the f allele and the blue+black pair detect the r allele. PCR analysis of anterior and ventral prostate (AP and VP) and spleen (Sp) for the f and r alleles is shown (right). Prostate-specific Cre expression is driven by the probasin promoter [1].

#### Reference

1. Maddison, L.A.; Nahm, H.; DeMayo, F.; Greenberg, N.M. Prostate Specific Expression of Cre Recombinase in Transgenic Mice. *genesis* **2000**, *26*, 154–156, doi:10.1002/(SICI)1526-968X(200002)26:2<154::AID-GENE18>3.0.CO;2-
